# Supplementary material for: Numerical and Experimental Mechanical Analysis of Additively Manufactured Ankle–Foot Orthoses
Source: MDPI journal article supplement (doi:10.3390/ma15176130), 2022-09-03
Supplement: s1 [file s1]

## Supplementary

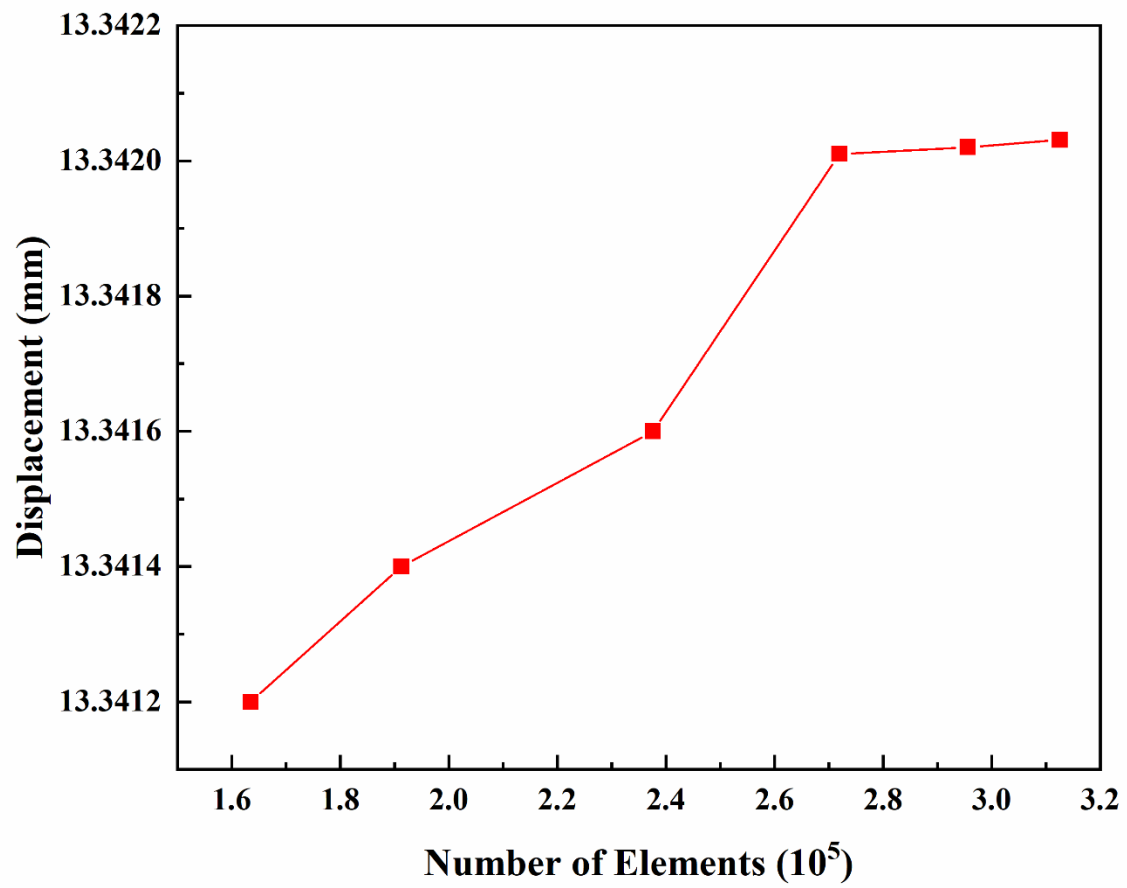

**Figure S1:** Mesh independency graph between displacement versus number of elements.

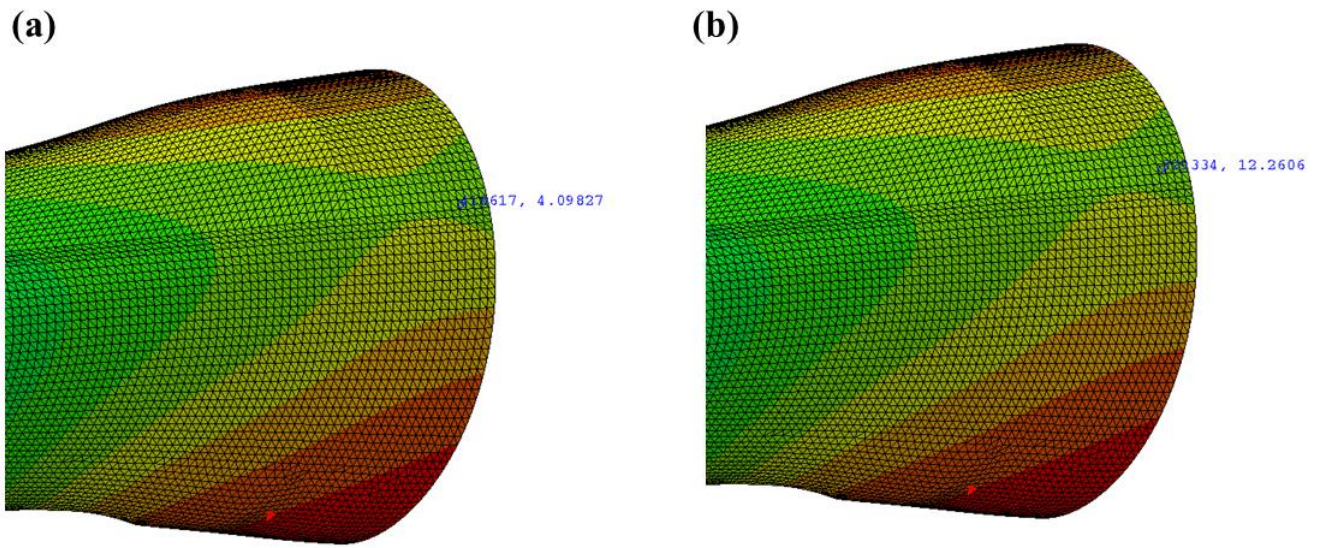

**Figure S2:** Predicted displacement values at (a) 50 N and (b) 150 N for PLA-based AFOs.

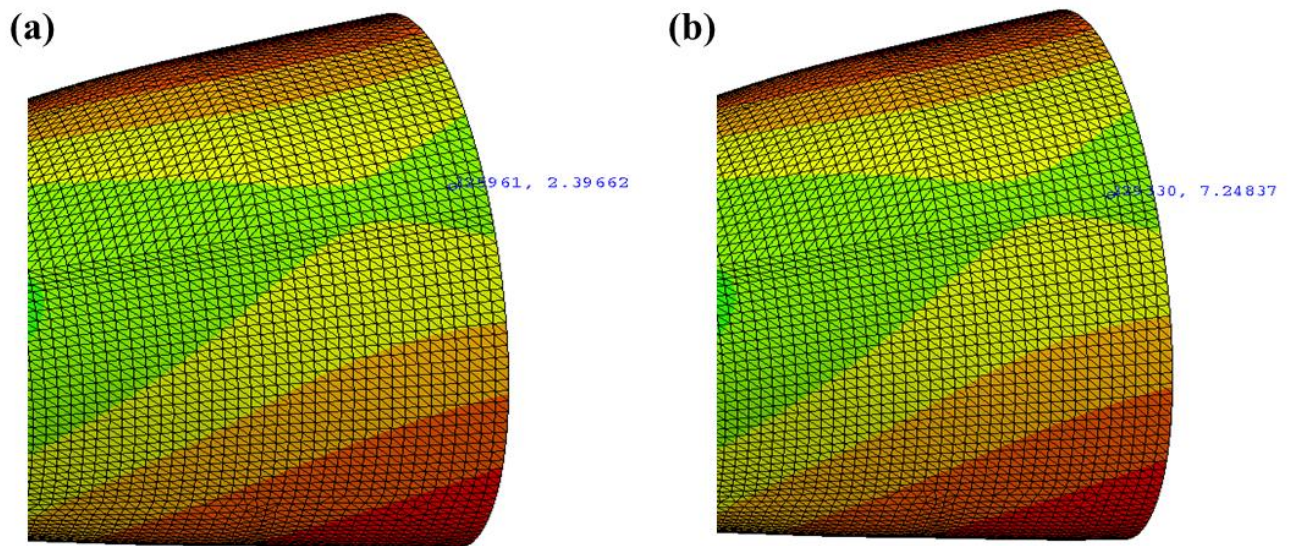

**Figure S3:** Predicted displacement values at (a) 50 N and (b) 150 N for PLA-C-based AFOs.

**Table S1:** Simulation and experimental displacements for AFOs manufactured using PLA at different forces.

| <b>Force (N)</b> | <b>Displacement<br/>(Experimental)<br/>(mm)</b> | <b>Displacement<br/>(Predicted)<br/>(mm)</b> | <b>Error (%)</b> |
|------------------|-------------------------------------------------|----------------------------------------------|------------------|
| 50               | 4.012                                           | 4.098                                        | 2.098            |
| 100              | 8.047                                           | 8.513                                        | 5.473            |
| 150              | 12.010                                          | 12.260                                       | 2.039            |
| 160              | 13.342                                          | 13.356                                       | 0.105            |

**Table S2:** Simulation and experimental displacements for AFOs manufactured using PLA-C at different forces.

| <b>Force (N)</b> | <b>Displacement<br/>(Experimental)<br/>(mm)</b> | <b>Displacement<br/>(Predicted)<br/>(mm)</b> | <b>Error (%)</b> |
|------------------|-------------------------------------------------|----------------------------------------------|------------------|
| 50               | 2.462                                           | 2.396                                        | 2.754            |
| 100              | 4.792                                           | 4.912                                        | 2.443            |
| 150              | 7.221                                           | 7.248                                        | 0.373            |
| 160              | 7.888                                           | 7.893                                        | 0.069            |
